# Supplementary material
Source: Springer Nature journal article supplement (https://www.springermedizin.de/resource/supplementary/12865_2003_42_MOESM2_ESM.pdf/9428434)

**FVB****Tie2-lacZ****VWF-lacZ**

Antiserum Titer (Ab33)

 $10^{-8}$   
 $10^{-7}$   
 $10^{-6}$   
 $10^{-5}$   
 $10^{-4}$   
 $10^{-3}$ ■ IgG1  
▲ IgG2a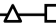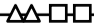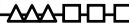

Supplement: MOESM2 [file 9428434]
